# Supplementary material
Source: Copernicus journal article supplement (doi:10.5194/egusphere-2026-1928)
Supplement: Supplementary file 1 [file egusphere-2026-1928-supplement.pdf]

**How humidity makes HONO the dominant sink  
of alkyl substituted Criegee intermediates and a  
key nocturnal source of OH radicals.**

Vishva Jeet Anand and Pradeep Kumar\*

*Department of Chemistry, Malaviya National Institute of Technology Jaipur, Jaipur,  
302017, India*

E-mail: [pradeep.chy@mnit.ac.in](mailto:pradeep.chy@mnit.ac.in)

# S1 Details of the methodology used for the electronic structure theory

To estimate energies at CCSD(T)/CBS level of theory, first we calculated the single point energies at CCSD(T)/aug-cc-pVDZ, and CCSD(T)/aug-cc-pVTZ level of theory, and then extrapolated these energies to corresponding CBS limit using the method of Varandas and Pansini.<sup>1,2</sup> Specifically, for the extrapolation of correlation energies, the following equation is used:

$$\text{CBS(Corr)} = \frac{2.71^3 E_{\text{ATZ}} - 1.91^3 E_{\text{ADZ}}}{2.71^3 - 1.91^3}$$

Where,  $E_{\text{ADZ}}$  and  $E_{\text{ATZ}}$  are correlation energies at CCSD(T)/aug-cc-pVDZ and CCSD(T)/aug-cc-pVTZ level of theory, respectively. For the extrapolation of Hartree-Fock energies, the following equation is used:

$$\text{CBS(HF)} = \frac{2.96^5 E_{\text{ATZ}} - 2.08^5 E_{\text{ADZ}}}{2.96^5 - 2.08^5}$$

Where,  $E_{\text{ADZ}}$  and  $E_{\text{ATZ}}$  are Hartree-Fock energies at CCSD(T)/aug-cc-pVDZ and CCSD(T)/aug-cc-pVTZ level of theory, respectively.

# S2 Details of master equation calculation

The simulation requires two inputs; dissociation rate constants of well separating into the reactants ( $k_r(\text{E})$ ) and unimolecular transformation rate ( $k_{uni}$ ). To compute  $k_r(\text{E})$ , MultiWell uses inverse Laplace transformation (ILT) method. The ILT method requires a pre-exponential factor for the unimolecular dissociation from RC to isolated reactants, which have been estimated using KTOOLS code available in MultiWell suite of programs.<sup>3</sup> For the unimolecular dissociation step, we used Rice-Ramsperger-Kassel-Marcus (RRKM) theory to calculate unimolecular rate constant ( $k_{uni}$ ). To mimic air, we have used  $\text{N}_2$  as the bath

gas, (corresponding Lennard Jones (L-J) parameters are  $\sigma = 3.74 \text{ \AA}$ , and  $\epsilon/kT = 82.0 \text{ K}$ ). To simulate the energy transfer model, a single exponential model was used with maximum energy  $50000 \text{ cm}^{-1}$  and grain size of  $100 \text{ cm}^{-1}$ .

Table S1: Cartesian coordinates and all normal mode frequencies of the optimized geometries calculated at M06-2X/aug-cc-pVTZ level of theory.

| Species           | Cartesian coordinates (Å) |           |           | Frequency (cm <sup>-1</sup> ) |         |         |         |
|-------------------|---------------------------|-----------|-----------|-------------------------------|---------|---------|---------|
| HONO              | N                         | 0.000000  | 0.507841  | 0.000000                      | 578.25  | 700.42  | 905.04  |
|                   | O                         | 0.882551  | -0.567177 | 0.000000                      | 1342.40 | 1841.11 | 3830.82 |
|                   | O                         | -1.101711 | 0.141484  | 0.000000                      |         |         |         |
|                   | H                         | 1.753278  | -0.149345 | 0.000000                      |         |         |         |
| CH <sub>2</sub> O | O                         | -0.670517 | -0.000022 | 0.000001                      | 1213.53 | 1273.49 | 1539.85 |
|                   | C                         | 0.525515  | 0.000000  | -0.000003                     | 1869.05 | 2945.55 | 3015.83 |
|                   | H                         | 1.105357  | 0.938452  | 0.000006                      |         |         |         |
|                   | H                         | 1.105686  | -0.938280 | 0.000006                      |         |         |         |
| HONO-WM           | N                         | 0.000000  | 0.000000  | 0.000000                      | 54.45   | 126.99  | 164.70  |
|                   | O                         | 0.000000  | 0.000000  | 1.362978                      | 214.87  | 251.07  | 356.84  |
|                   | H                         | 0.954537  | 0.000000  | 1.577834                      | 743.64  | 823.39  | 980.20  |
|                   | O                         | -1.082840 | -0.000091 | -0.440978                     | 1471.28 | 1614.81 | 1814.28 |
|                   | O                         | 2.737695  | 0.038716  | 1.197557                      | 3575.40 | 3846.44 | 3950.86 |
|                   | H                         | 2.712604  | 0.000304  | 0.236470                      |         |         |         |
|                   | H                         | 3.416194  | -0.580443 | 1.476227                      |         |         |         |
| RC1               | O                         | -2.290632 | -0.005198 | 0.299978                      | 44.59   | 70.96   | 89.08   |
|                   | O                         | -1.590609 | -0.932425 | -0.472859                     | 119.04  | 142.62  | 183.84  |
|                   | C                         | -0.718236 | -1.567441 | 0.123953                      | 255.30  | 280.56  | 305.80  |
|                   | H                         | -0.160286 | -2.289775 | -0.459503                     | 375.27  | 525.15  | 561.39  |
|                   | H                         | -0.595398 | -1.422324 | 1.190966                      | 741.45  | 791.57  | 872.48  |
|                   | N                         | 1.451568  | -0.245451 | 0.037543                      | 1032.26 | 1105.71 | 1118.11 |
|                   | O                         | 1.690969  | 1.049961  | -0.047199                     | 1135.53 | 1248.03 | 1444.44 |
|                   | H                         | 0.765057  | 1.482418  | -0.030813                     | 1583.43 | 1646.32 | 1680.44 |
|                   | O                         | 2.420049  | -0.920451 | 0.034985                      | 1785.44 | 2704.73 | 2994.62 |

|                         |   |           |           |           |         |         |         |
|-------------------------|---|-----------|-----------|-----------|---------|---------|---------|
|                         | O | -0.669560 | 1.995074  | 0.035543  | 3143.34 | 3285.91 | 3921.56 |
|                         | H | -1.364055 | 1.274969  | 0.146618  |         |         |         |
|                         | H | -0.978614 | 2.581815  | -0.657373 |         |         |         |
| CH <sub>2</sub> OO-WM   | O | 0.000000  | 0.000000  | 0.000000  | 109.89  | 171.45  | 222.30  |
|                         | O | 0.000000  | 0.000000  | 1.366796  | 226.96  | 435.97  | 535.20  |
|                         | C | 1.093923  | 0.000000  | 1.940039  | 682.82  | 714.49  | 895.96  |
|                         | H | 1.051477  | -0.020008 | 3.021832  | 1079.95 | 1270.14 | 1455.41 |
|                         | H | 2.006762  | 0.014427  | 1.356032  | 1640.64 | 1662.85 | 3140.67 |
|                         | O | 1.840976  | -1.998828 | 0.163746  | 3286.46 | 3550.81 | 3937.00 |
|                         | H | 1.145356  | -1.413054 | -0.192863 |         |         |         |
|                         | H | 1.693010  | -2.861436 | -0.226231 |         |         |         |
| PC1                     | O | -1.146336 | -1.213073 | 0.689277  | 57.27   | 79.58   | 130.36  |
|                         | O | -0.465321 | -1.202523 | -0.562042 | 161.73  | 235.96  | 250.35  |
|                         | C | 0.856368  | -1.042565 | -0.298790 | 290.72  | 329.39  | 432.06  |
|                         | H | 1.422516  | -1.293672 | -1.193253 | 504.28  | 558.79  | 601.05  |
|                         | H | 1.202243  | -1.591157 | 0.573659  | 718.46  | 822.61  | 926.83  |
|                         | N | 1.232789  | 0.417018  | -0.007153 | 969.17  | 1117.98 | 1224.96 |
|                         | O | 0.415026  | 1.286025  | -0.201169 | 1302.74 | 1375.26 | 1452.86 |
|                         | H | -1.571988 | 1.401111  | -0.260506 | 1506.26 | 1549.61 | 1617.12 |
|                         | O | 2.361362  | 0.583669  | 0.374153  | 1712.63 | 3115.94 | 3188.45 |
|                         | O | -2.423202 | 1.070396  | 0.056480  | 3401.48 | 3790.83 | 3931.26 |
|                         | H | -1.741374 | -0.435946 | 0.571156  |         |         |         |
|                         | H | -3.011367 | 1.059964  | -0.701825 |         |         |         |
| CH <sub>2</sub> OO-HONO | O | 1.726645  | 0.149075  | -0.424619 | 65.11   | 92.16   | 142.24  |
|                         | C | 1.420994  | 1.180380  | 0.176914  | 166.18  | 224.27  | 273.11  |
|                         | H | 1.576944  | 2.106624  | -0.363474 | 525.70  | 695.30  | 769.68  |
|                         | H | 1.036518  | 1.112184  | 1.187704  | 876.31  | 1010.42 | 1052.16 |

|                    |   |           |           |           |         |         |         |
|--------------------|---|-----------|-----------|-----------|---------|---------|---------|
|                    | N | -1.275186 | 0.258091  | 0.073861  | 1107.39 | 1256.42 | 1448.64 |
|                    | O | -1.091003 | -1.060534 | -0.093082 | 1557.40 | 1679.05 | 1793.75 |
|                    | H | -0.100623 | -1.185359 | 0.034659  | 2990.53 | 3141.61 | 3286.10 |
|                    | O | -2.398689 | 0.584560  | -0.031905 |         |         |         |
| WM                 | O | 0.000000  | 0.116499  | 0.000000  | 1620.74 | 3866.96 | 3969.44 |
|                    | H | 0.762335  | -0.465889 | 0.000000  |         |         |         |
|                    | H | -0.762335 | -0.466105 | 0.000000  |         |         |         |
| CH <sub>2</sub> OO | C | 1.057098  | -0.186174 | 0.000000  | 538.15  | 697.71  | 927.20  |
|                    | H | 1.006167  | -1.269154 | 0.000000  | 1023.97 | 1260.68 | 1433.37 |
|                    | H | 1.966689  | 0.398409  | 0.000000  | 1630.89 | 3139.98 | 3290.59 |
|                    | O | 0.000000  | 0.459688  | 0.000000  |         |         |         |
|                    | O | -1.164430 | -0.211215 | 0.000000  |         |         |         |
| TS1                | O | -2.168499 | -0.265149 | 0.363952  | -192.58 | 61.31   | 87.13   |
|                    | O | -1.351239 | -1.032554 | -0.495819 | 157.95  | 169.02  | 231.95  |
|                    | C | -0.365843 | -1.535524 | 0.069640  | 309.04  | 343.14  | 396.47  |
|                    | H | 0.262187  | -2.177531 | -0.536319 | 473.41  | 526.96  | 642.84  |
|                    | H | -0.302919 | -1.493424 | 1.150480  | 809.44  | 849.00  | 866.93  |
|                    | N | 1.378564  | -0.118013 | 0.039187  | 1127.14 | 1206.42 | 1235.68 |
|                    | O | 1.413544  | 1.177659  | -0.054333 | 1245.08 | 1264.33 | 1432.32 |
|                    | H | 0.397617  | 1.511818  | -0.046159 | 1547.21 | 1636.29 | 1671.08 |
|                    | O | 2.426002  | -0.665711 | 0.071156  | 1794.83 | 1960.53 | 2462.60 |
|                    | O | -0.942390 | 1.883534  | 0.025921  | 3148.15 | 3288.49 | 3941.63 |
|                    | H | -1.537902 | 1.043013  | 0.173589  |         |         |         |
|                    | H | -1.293219 | 2.373119  | -0.720741 |         |         |         |
| OH                 | O | 0.000000  | 0.000000  | 0.107992  | 3769.62 |         |         |
|                    | H | 0.000000  | 0.000000  | -0.863937 |         |         |         |
| NO <sub>2</sub>    | N | 0.000000  | 0.000000  | 0.314473  | 783.52  | 1465.18 | 1775.31 |

|                |   |           |           |           |         |         |         |
|----------------|---|-----------|-----------|-----------|---------|---------|---------|
|                | O | 0.000000  | 1.090255  | -0.137582 |         |         |         |
|                | O | 0.000000  | -1.090255 | -0.137582 |         |         |         |
| $RC_{syn}$     | O | 0.000000  | 0.000000  | 0.000000  | 32.18   | 46.53   | 66.87   |
|                | O | 0.000000  | 0.000000  | 1.390754  | 98.38   | 128.57  | 149.61  |
|                | C | 1.117276  | 0.000000  | 1.937487  | 187.69  | 218.54  | 235.42  |
|                | N | 1.596427  | -2.629572 | 2.583009  | 292.58  | 330.03  | 358.06  |
|                | O | 1.447251  | -3.661967 | 1.755844  | 474.02  | 595.53  | 674.66  |
|                | H | 1.105091  | -3.246428 | 0.902117  | 783.83  | 817.28  | 899.26  |
|                | O | 1.993708  | -2.934223 | 3.650061  | 976.10  | 1002.41 | 1036.71 |
|                | C | 2.375320  | 0.050311  | 1.184035  | 1090.28 | 1102.59 | 1120.00 |
|                | H | 2.366258  | 0.958108  | 0.575131  | 1369.25 | 1417.43 | 1448.19 |
|                | H | 3.226334  | 0.027169  | 1.855929  | 1470.90 | 1575.83 | 1672.42 |
|                | H | 2.406716  | -0.783028 | 0.480652  | 1677.40 | 1790.81 | 2848.30 |
|                | H | 1.061664  | 0.003529  | 3.020857  | 3037.49 | 3064.52 | 3122.66 |
|                | O | 0.629156  | -2.476467 | -0.394229 | 3192.28 | 3205.02 | 3919.16 |
|                | H | 0.320381  | -1.521248 | -0.308982 |         |         |         |
|                | H | -0.006813 | -2.930764 | -0.950408 |         |         |         |
| $Syn-CH_3CHOO$ | C | -0.471838 | 0.672873  | -0.000110 | 165.46  | 341.56  | 449.39  |
|                | O | 0.769424  | 0.575000  | -0.000074 | 655.13  | 820.68  | 897.06  |
|                | O | 1.343717  | -0.657592 | 0.000139  | 936.68  | 1070.13 | 1162.88 |
|                | C | -1.392753 | -0.475360 | 0.000003  | 1362.09 | 1418.97 | 1441.02 |
|                | H | -2.039879 | -0.413405 | -0.877006 | 1477.33 | 1660.72 | 3064.62 |
|                | H | -0.827002 | -1.399901 | -0.000842 | 3118.90 | 3186.86 | 3208.01 |
|                | H | -2.038482 | -0.414327 | 0.878122  |         |         |         |
|                | H | -0.812225 | 1.703289  | -0.000157 |         |         |         |
| $PC_{syn}$     | O | 0.000000  | 0.000000  | 0.000000  | 34.67   | 56.10   | 122.43  |
|                | O | 0.000000  | 0.000000  | 1.424644  | 155.23  | 196.14  | 218.38  |

|                             |   |           |           |           |         |         |         |
|-----------------------------|---|-----------|-----------|-----------|---------|---------|---------|
|                             | C | 1.293499  | 0.000000  | 1.870622  | 234.84  | 266.18  | 299.32  |
|                             | N | 1.887569  | -1.434722 | 1.810293  | 334.80  | 370.99  | 460.85  |
|                             | O | 1.169101  | -2.353890 | 1.490545  | 500.97  | 585.17  | 644.75  |
|                             | H | -0.597347 | -2.647733 | 0.654714  | 768.61  | 820.33  | 892.63  |
|                             | O | 3.043293  | -1.536901 | 2.131876  | 921.95  | 997.95  | 1073.44 |
|                             | C | 2.243188  | 0.951114  | 1.179943  | 1167.51 | 1229.87 | 1326.52 |
|                             | H | 1.787705  | 1.938953  | 1.190416  | 1379.80 | 1414.62 | 1487.61 |
|                             | H | 3.190013  | 0.977359  | 1.709259  | 1491.56 | 1502.07 | 1551.52 |
|                             | H | 2.405099  | 0.649211  | 0.149730  | 1616.11 | 1698.15 | 3101.48 |
|                             | H | 1.229220  | 0.182194  | 2.943647  | 3118.33 | 3181.71 | 3199.29 |
|                             | O | -1.246505 | -2.392333 | -0.014761 | 3422.67 | 3791.23 | 3933.32 |
|                             | H | -0.513687 | -0.823231 | -0.167584 |         |         |         |
|                             | H | -2.105556 | -2.430755 | 0.411307  |         |         |         |
| Syn-CH <sub>3</sub> CHOO-WM | O | 0.000000  | 0.000000  | 0.000000  | 83.92   | 133.15  | 162.21  |
|                             | O | 0.000000  | 0.000000  | 1.375845  | 205.38  | 237.49  | 335.65  |
|                             | C | 1.109534  | 0.000000  | 1.940049  | 431.00  | 479.80  | 675.82  |
|                             | H | 1.028125  | -0.019777 | 3.022271  | 743.44  | 793.63  | 908.75  |
|                             | O | 1.060319  | -2.503447 | 0.059795  | 997.22  | 1093.51 | 1123.79 |
|                             | H | 0.559664  | -1.697102 | -0.178781 | 1363.27 | 1416.33 | 1449.34 |
|                             | H | 0.542033  | -3.246985 | -0.250920 | 1474.87 | 1638.61 | 1668.15 |
|                             | C | 2.380086  | 0.037828  | 1.213265  | 3043.51 | 3108.79 | 3181.91 |
|                             | H | 2.507586  | -0.925315 | 0.707096  | 3195.92 | 3498.72 | 3936.79 |
|                             | H | 2.306783  | 0.789763  | 0.425811  |         |         |         |
|                             | H | 3.207799  | 0.225439  | 1.889122  |         |         |         |
| TS <sub>syn</sub>           | O | 0.000000  | 0.000000  | 0.000000  | -557.18 | 33.08   | 79.47   |
|                             | O | 0.000000  | 0.000000  | 1.415367  | 136.65  | 175.53  | 191.23  |
|                             | C | 1.146683  | 0.000000  | 1.940809  | 221.10  | 255.21  | 343.03  |

|                               |   |           |           |           |         |         |         |
|-------------------------------|---|-----------|-----------|-----------|---------|---------|---------|
|                               | N | 1.667580  | -2.077950 | 2.423538  | 376.38  | 407.87  | 456.61  |
|                               | O | 1.422701  | -3.133422 | 1.730380  | 558.74  | 653.34  | 669.16  |
|                               | H | 0.875543  | -2.806168 | 0.787499  | 737.67  | 899.70  | 919.09  |
|                               | O | 2.247464  | -2.225245 | 3.449139  | 978.38  | 1000.47 | 1105.65 |
|                               | C | 2.382790  | 0.274516  | 1.178627  | 1153.57 | 1281.22 | 1331.84 |
|                               | H | 2.316210  | 1.307061  | 0.825746  | 1365.43 | 1385.54 | 1410.64 |
|                               | H | 3.247473  | 0.149850  | 1.823027  | 1455.38 | 1475.97 | 1609.32 |
|                               | H | 2.445235  | -0.360749 | 0.300238  | 1657.59 | 1677.35 | 1786.35 |
|                               | H | 1.112446  | 0.105173  | 3.020389  | 1854.45 | 3070.03 | 3153.62 |
|                               | O | 0.300092  | -2.392448 | -0.274703 | 3188.14 | 3202.23 | 3911.00 |
|                               | H | 0.110217  | -1.307310 | -0.217069 |         |         |         |
|                               | H | -0.523801 | -2.850519 | -0.454678 |         |         |         |
| Syn-CH <sub>3</sub> CHOO-HONO | O | -1.022440 | -1.389816 | -0.428953 | 59.08   | 58.44   | 94.51   |
|                               | O | -1.361403 | -0.658104 | 0.700512  | 101.68  | 155.97  | 196.25  |
|                               | C | -1.529230 | 0.565794  | 0.573519  | 275.66  | 349.71  | 450.14  |
|                               | N | 1.448777  | 0.299881  | 0.094664  | 648.86  | 774.66  | 843.77  |
|                               | O | 1.528062  | -0.979194 | -0.290260 | 884.97  | 929.35  | 1048.56 |
|                               | H | 0.559532  | -1.260403 | -0.378857 | 1068.04 | 1094.67 | 1175.06 |
|                               | O | 2.502350  | 0.806017  | 0.239210  | 1373.19 | 1421.79 | 1436.99 |
|                               | C | -1.438881 | 1.318669  | -0.681710 | 1468.15 | 1569.82 | 1690.08 |
|                               | H | -0.742472 | 2.144927  | -0.532145 | 1786.22 | 2895.78 | 3062.70 |
|                               | H | -1.119835 | 0.678897  | -1.494913 | 3123.18 | 3178.70 | 3219.65 |
|                               | H | -2.420961 | 1.753074  | -0.886833 |         |         |         |
|                               | H | -1.781586 | 1.046339  | 1.515168  |         |         |         |
| PC <sub>anti</sub>            | O | 0.000000  | 0.000000  | 0.000000  | 55.74   | 66.12   | 134.10  |
|                               | O | 0.000000  | 0.000000  | 1.423915  | 160.35  | 213.53  | 224.00  |
|                               | C | 1.302184  | 0.000000  | 1.832909  | 237.92  | 275.09  | 284.28  |

|                                |   |           |           |           |         |         |         |
|--------------------------------|---|-----------|-----------|-----------|---------|---------|---------|
|                                | N | 1.945819  | -1.385508 | 1.594495  | 304.47  | 339.34  | 504.88  |
|                                | O | 1.226563  | -2.358337 | 1.540060  | 512.19  | 544.75  | 688.66  |
|                                | H | -0.540230 | -2.672175 | 0.689657  | 733.83  | 814.96  | 896.57  |
|                                | O | 3.146929  | -1.398980 | 1.531463  | 926.05  | 1043.25 | 1092.19 |
|                                | C | 1.352229  | 0.259677  | 3.319500  | 1162.07 | 1246.11 | 1336.40 |
|                                | H | 2.378137  | 0.188906  | 3.671684  | 1370.83 | 1409.49 | 1488.57 |
|                                | H | 0.971135  | 1.259385  | 3.511542  | 1493.51 | 1505.64 | 1546.89 |
|                                | H | 0.731291  | -0.466901 | 3.840440  | 1617.88 | 1706.94 | 3088.26 |
|                                | H | 1.925328  | 0.666496  | 1.240311  | 3140.15 | 3172.56 | 3180.89 |
|                                | O | -1.180160 | -2.428698 | 0.006707  | 3415.98 | 3786.11 | 3930.82 |
|                                | H | -0.493412 | -0.834724 | -0.172586 |         |         |         |
|                                | H | -2.046570 | -2.483207 | 0.415888  |         |         |         |
| Anti-CH <sub>3</sub> CHOO-HONO | O | -0.616573 | 1.844813  | 0.169480  | 66.37   | 74.39   | 134.85  |
|                                | O | -1.299339 | 0.744665  | -0.366819 | 159.68  | 182.33  | 235.22  |
|                                | C | -1.362495 | -0.246970 | 0.371927  | 257.37  | 327.69  | 354.49  |
|                                | N | 1.393025  | -0.447478 | 0.098224  | 560.10  | 780.03  | 871.61  |
|                                | O | 1.707352  | 0.821541  | -0.160293 | 894.64  | 982.14  | 1075.66 |
|                                | H | 0.828954  | 1.333596  | -0.035489 | 1096.17 | 1118.35 | 1181.82 |
|                                | O | 2.304110  | -1.188217 | -0.001157 | 1367.46 | 1417.51 | 1460.81 |
|                                | C | -1.978633 | -1.488604 | -0.119930 | 1466.55 | 1603.12 | 1697.40 |
|                                | H | -1.214565 | -2.269108 | -0.092410 | 1787.98 | 2685.06 | 3064.37 |
|                                | H | -2.777369 | -1.791845 | 0.557855  | 3126.47 | 3183.87 | 3195.75 |
|                                | H | -2.355182 | -1.367322 | -1.130703 |         |         |         |
|                                | H | -0.950640 | -0.141939 | 1.371512  |         |         |         |
| Anti-CH <sub>3</sub> CHOO-WM   | O | 0.000000  | 0.000000  | 0.000000  | 78.06   | 139.87  | 171.75  |
|                                | O | 0.000000  | 0.000000  | 1.387237  | 221.16  | 243.43  | 293.05  |
|                                | C | 1.108151  | 0.000000  | 1.939197  | 336.10  | 479.42  | 563.77  |

|                     |   |           |           |           |         |         |         |
|---------------------|---|-----------|-----------|-----------|---------|---------|---------|
|                     | H | 1.983128  | 0.046899  | 1.297202  | 764.58  | 877.75  | 898.75  |
|                     | O | 1.673139  | -2.093205 | 0.298476  | 987.88  | 1111.64 | 1179.44 |
|                     | H | 1.025256  | -1.465234 | -0.088166 | 1375.81 | 1423.84 | 1464.26 |
|                     | H | 1.473886  | -2.950620 | -0.079666 | 1468.14 | 1654.39 | 1693.53 |
|                     | C | 1.187916  | -0.085568 | 3.407872  | 3064.91 | 3125.73 | 3180.21 |
|                     | H | 1.780132  | 0.744934  | 3.793624  | 3192.28 | 3443.33 | 3936.77 |
|                     | H | 0.197898  | -0.088165 | 3.853653  |         |         |         |
|                     | H | 1.716082  | -1.007043 | 3.662818  |         |         |         |
| TS <sub>anti</sub>  | O | 0.000000  | 0.000000  | 0.000000  | -762.93 | 49.68   | 87.08   |
|                     | O | 0.000000  | 0.000000  | 1.417936  | 136.37  | 150.00  | 205.50  |
|                     | C | 1.153106  | 0.000000  | 1.913403  | 238.16  | 247.15  | 285.42  |
|                     | N | 1.856257  | -2.194341 | 1.934882  | 336.35  | 414.34  | 425.53  |
|                     | O | 1.446136  | -3.190921 | 1.242042  | 545.85  | 553.82  | 642.59  |
|                     | H | 0.610549  | -2.824372 | 0.511591  | 686.91  | 895.84  | 907.80  |
|                     | O | 2.744020  | -2.407777 | 2.701994  | 941.74  | 1023.10 | 1111.61 |
|                     | C | 1.291402  | 0.180772  | 3.370702  | 1181.46 | 1281.68 | 1354.39 |
|                     | H | 2.136870  | -0.400937 | 3.730406  | 1390.22 | 1418.01 | 1449.96 |
|                     | H | 1.499252  | 1.238822  | 3.548690  | 1457.43 | 1479.85 | 1585.86 |
|                     | H | 0.375450  | -0.098838 | 3.883222  | 1618.92 | 1657.70 | 1753.77 |
|                     | H | 1.980540  | 0.132313  | 1.224933  | 1768.59 | 3066.58 | 3144.37 |
|                     | O | -0.222889 | -2.387516 | -0.286778 | 3188.56 | 3204.82 | 3914.61 |
|                     | H | -0.186241 | -1.277525 | -0.215418 |         |         |         |
|                     | H | -1.113629 | -2.704655 | -0.124114 |         |         |         |
| CH <sub>3</sub> CHO | O | 1.225110  | -0.277160 | 0.000012  | 157.93  | 513.52  | 775.87  |
|                     | C | 0.233225  | 0.397942  | -0.000028 | 901.03  | 1138.42 | 1145.81 |
|                     | C | -1.162542 | -0.147780 | 0.000016  | 1380.62 | 1430.18 | 1464.97 |
|                     | H | -1.695786 | 0.224423  | -0.876544 | 1474.83 | 1866.20 | 2944.54 |

|                           |   |           |           |           |         |         |         |
|---------------------------|---|-----------|-----------|-----------|---------|---------|---------|
|                           | H | -1.148137 | -1.233950 | -0.000521 | 3062.92 | 3125.06 | 3180.09 |
|                           | H | -1.695288 | 0.223800  | 0.877120  |         |         |         |
|                           | H | 0.314228  | 1.502036  | -0.000078 |         |         |         |
| $RC_{anti}$               | O | 0.000000  | 0.000000  | 0.000000  | 38.41   | 74.70   | 87.30   |
|                           | O | 0.000000  | 0.000000  | 1.402033  | 116.38  | 150.27  | 177.34  |
|                           | C | 1.119924  | 0.000000  | 1.931327  | 197.78  | 235.20  | 254.28  |
|                           | N | 1.805404  | -2.633315 | 1.891567  | 293.82  | 311.05  | 334.04  |
|                           | O | 1.519935  | -3.638411 | 1.090127  | 404.14  | 560.52  | 571.39  |
|                           | H | 0.864991  | -3.239223 | 0.407996  | 794.59  | 887.24  | 895.89  |
|                           | O | 2.552328  | -2.914181 | 2.767149  | 988.80  | 1076.48 | 1121.26 |
|                           | C | 1.243766  | 0.029365  | 3.396390  | 1132.59 | 1151.87 | 1182.72 |
|                           | H | 1.885163  | -0.799130 | 3.703494  | 1366.77 | 1421.91 | 1462.58 |
|                           | H | 1.743736  | 0.956145  | 3.685278  | 1471.76 | 1577.65 | 1641.85 |
|                           | H | 0.270482  | -0.036932 | 3.872808  | 1694.53 | 1771.22 | 2626.90 |
|                           | H | 1.975117  | 0.021873  | 1.261113  | 2904.37 | 3061.68 | 3122.97 |
|                           | O | -0.056536 | -2.508822 | -0.533297 | 3178.50 | 3190.37 | 3925.10 |
|                           | H | -0.078980 | -1.510374 | -0.362531 |         |         |         |
| Anti-CH <sub>3</sub> CHOO | H | -0.964055 | -2.805213 | -0.621580 | 167.15  | 268.67  | 329.13  |
|                           | C | -0.370064 | 0.399514  | 0.000016  | 566.06  | 883.70  | 900.51  |
|                           | O | 0.566273  | -0.412482 | -0.000063 | 985.38  | 1094.93 | 1168.55 |
|                           | O | 1.839961  | 0.076479  | -0.000032 | 1362.72 | 1421.60 | 1467.69 |
|                           | C | -1.762798 | -0.093107 | 0.000051  | 1469.48 | 1674.11 | 3064.67 |
|                           | H | -2.286611 | 0.288683  | -0.877786 | 3121.08 | 3165.13 | 3183.30 |
|                           | H | -1.783663 | -1.179059 | -0.000432 |         |         |         |
|                           | H | -2.286246 | 0.287845  | 0.878481  |         |         |         |
|                           | H | -0.096187 | 1.452105  | 0.000090  |         |         |         |
| RC2                       | O | -1.518340 | 1.689900  | -0.050877 | 24.22   | 42.14   | 78.71   |

|     |   |           |           |           |         |         |         |
|-----|---|-----------|-----------|-----------|---------|---------|---------|
|     | O | -1.477583 | 0.467666  | -0.726720 | 92.78   | 114.92  | 156.56  |
|     | C | -1.361833 | -0.553042 | -0.013337 | 170.33  | 213.93  | 226.21  |
|     | N | 1.488350  | -0.702493 | -0.033268 | 237.75  | 282.24  | 305.08  |
|     | O | 2.411776  | 0.239245  | 0.062287  | 340.63  | 378.69  | 401.83  |
|     | H | 1.883679  | 1.109990  | -0.003208 | 497.86  | 566.82  | 602.52  |
|     | O | 1.924161  | -1.801742 | 0.022284  | 789.87  | 824.19  | 919.29  |
|     | O | 0.968107  | 2.335704  | -0.063622 | 954.03  | 995.68  | 1061.59 |
|     | H | -0.025051 | 2.135842  | -0.078774 | 1091.69 | 1104.81 | 1116.26 |
|     | H | 1.136366  | 2.982401  | -0.751385 | 1129.57 | 1319.28 | 1387.00 |
|     | C | -1.303220 | -0.442021 | 1.454586  | 1415.04 | 1448.95 | 1465.55 |
|     | H | -2.230612 | 0.022346  | 1.797341  | 1474.93 | 1488.51 | 1574.64 |
|     | H | -1.154070 | -1.416179 | 1.909189  | 1649.44 | 1665.12 | 1773.32 |
|     | H | -0.506769 | 0.250690  | 1.725141  | 2697.24 | 2923.85 | 3062.50 |
|     | C | -1.336358 | -1.850692 | -0.722312 | 3070.19 | 3124.98 | 3131.96 |
|     | H | -0.409138 | -2.365471 | -0.462045 | 3187.55 | 3191.06 | 3923.12 |
|     | H | -2.166977 | -2.463272 | -0.367084 |         |         |         |
|     | H | -1.402375 | -1.710554 | -1.796739 |         |         |         |
| PC2 | O | 1.028164  | -1.300551 | -0.811183 | 48.70   | 49.77   | 124.27  |
|     | O | 0.369047  | -1.093622 | 0.433834  | 154.86  | 196.15  | 212.48  |
|     | C | -0.814113 | -0.425203 | 0.208940  | 218.66  | 240.70  | 261.32  |
|     | N | -0.472760 | 1.055400  | -0.171621 | 270.36  | 301.05  | 334.48  |
|     | O | 0.577449  | 1.516056  | 0.220348  | 358.72  | 400.09  | 502.28  |
|     | H | 2.409114  | 0.809454  | 0.378329  | 507.80  | 571.85  | 597.57  |
|     | O | -1.310169 | 1.669680  | -0.778583 | 751.87  | 809.88  | 864.95  |
|     | O | 3.096128  | 0.197524  | 0.079372  | 894.46  | 961.87  | 982.93  |
|     | H | 1.885966  | -0.858770 | -0.618474 | 1030.40 | 1076.99 | 1180.42 |
|     | H | 3.535589  | -0.121738 | 0.870513  | 1275.49 | 1315.28 | 1404.37 |

|                                        |   |           |           |           |         |         |         |
|----------------------------------------|---|-----------|-----------|-----------|---------|---------|---------|
|                                        | C | -1.668856 | -1.016632 | -0.889934 | 1418.43 | 1478.11 | 1482.94 |
|                                        | H | -1.810029 | -2.070319 | -0.655362 | 1488.76 | 1497.61 | 1511.19 |
|                                        | H | -2.632457 | -0.518451 | -0.927482 | 1547.67 | 1617.64 | 1695.19 |
|                                        | H | -1.178539 | -0.931224 | -1.854301 | 3085.29 | 3097.72 | 3170.22 |
|                                        | C | -1.509307 | -0.333229 | 1.553804  | 3172.85 | 3178.71 | 3198.67 |
|                                        | H | -1.812204 | -1.334066 | 1.853405  | 3432.70 | 3780.65 | 3931.55 |
|                                        | H | -0.829457 | 0.075605  | 2.298389  |         |         |         |
|                                        | H | -2.389950 | 0.299392  | 1.469165  |         |         |         |
| (CH <sub>3</sub> ) <sub>2</sub> COO-WM | O | 0.985885  | 1.340866  | 0.335000  | 57.53   | 132.61  | 157.41  |
|                                        | O | -0.160359 | 0.999263  | -0.367179 | 174.26  | 211.38  | 215.89  |
|                                        | C | -0.826053 | 0.035157  | 0.067757  | 316.56  | 339.16  | 376.41  |
|                                        | O | 2.029418  | -0.994346 | -0.525791 | 459.55  | 507.75  | 604.75  |
|                                        | H | 1.889565  | -0.068127 | -0.230349 | 794.77  | 828.78  | 916.64  |
|                                        | H | 2.767329  | -0.974441 | -1.136330 | 950.72  | 993.44  | 1090.44 |
|                                        | C | -2.011454 | -0.348516 | -0.736432 | 1108.55 | 1317.19 | 1387.69 |
|                                        | H | -2.904616 | -0.305696 | -0.112050 | 1410.29 | 1451.19 | 1464.85 |
|                                        | H | -2.122392 | 0.298729  | -1.600808 | 1474.16 | 1492.57 | 1647.08 |
|                                        | H | -1.889506 | -1.384187 | -1.058893 | 1664.15 | 3054.83 | 3067.78 |
|                                        | C | -0.437619 | -0.663002 | 1.303744  | 3120.10 | 3128.09 | 3182.46 |
|                                        | H | 0.485370  | -1.215036 | 1.102753  | 3186.46 | 3418.29 | 3937.02 |
|                                        | H | -0.191819 | 0.080609  | 2.062241  |         |         |         |
|                                        | H | -1.222729 | -1.339954 | 1.626785  |         |         |         |
| (CH <sub>3</sub> ) <sub>2</sub> CO     | O | 0.000013  | 1.390777  | 0.000002  | 39.22   | 146.55  | 384.06  |
|                                        | C | -0.000006 | 0.185947  | -0.000013 | 494.19  | 541.14  | 806.77  |
|                                        | C | -1.282412 | -0.610523 | 0.000004  | 889.07  | 898.61  | 1087.27 |
|                                        | H | -2.136940 | 0.059123  | 0.000233  | 1126.38 | 1251.18 | 1388.77 |
|                                        | H | -1.315928 | -1.258270 | -0.877237 | 1398.10 | 1462.58 | 1468.95 |

|                                          |   |           |           |           |         |         |         |
|------------------------------------------|---|-----------|-----------|-----------|---------|---------|---------|
|                                          | H | -1.315694 | -1.258605 | 0.877009  | 1473.72 | 1492.86 | 1848.60 |
|                                          | C | 1.282400  | -0.610541 | -0.000005 | 3063.45 | 3069.03 | 3125.10 |
|                                          | H | 1.315922  | -1.258224 | 0.877284  | 3131.99 | 3180.56 | 3181.53 |
|                                          | H | 1.315719  | -1.258660 | -0.876975 |         |         |         |
|                                          | H | 2.136918  | 0.059119  | -0.000245 |         |         |         |
| TS2                                      | O | -1.595005 | 1.539644  | 0.022326  | -983.16 | 36.93   | 77.27   |
|                                          | O | -1.428598 | 0.341242  | -0.704379 | 111.68  | 129.49  | 137.93  |
|                                          | C | -1.106546 | -0.666828 | -0.014578 | 185.99  | 199.86  | 245.44  |
|                                          | N | 1.405466  | -0.531162 | -0.048055 | 284.79  | 302.30  | 354.58  |
|                                          | O | 2.151617  | 0.497828  | 0.062855  | 392.09  | 399.74  | 473.84  |
|                                          | H | 1.398858  | 1.492147  | -0.029300 | 528.01  | 589.93  | 663.57  |
|                                          | O | 1.951820  | -1.600485 | 0.010709  | 704.07  | 823.12  | 892.17  |
|                                          | O | 0.651678  | 2.374371  | -0.088822 | 923.70  | 984.47  | 1003.26 |
|                                          | H | -0.490929 | 2.005714  | -0.061314 | 1100.31 | 1104.19 | 1269.52 |
|                                          | H | 0.833353  | 2.919187  | -0.857362 | 1322.41 | 1349.59 | 1400.73 |
|                                          | C | -1.049803 | -0.615071 | 1.460301  | 1412.72 | 1447.28 | 1454.94 |
|                                          | H | -0.599510 | -1.526452 | 1.841054  | 1467.43 | 1474.22 | 1486.34 |
|                                          | H | -0.511179 | 0.264675  | 1.797299  | 1493.27 | 1600.41 | 1629.90 |
|                                          | H | -2.079899 | -0.521298 | 1.817194  | 1637.47 | 1761.32 | 3059.06 |
|                                          | C | -1.038540 | -1.942658 | -0.754940 | 3066.78 | 3125.05 | 3157.07 |
|                                          | H | -0.088537 | -2.425551 | -0.519600 | 3189.68 | 3206.42 | 3912.64 |
|                                          | H | -1.846944 | -2.582926 | -0.393992 |         |         |         |
|                                          | H | -1.136241 | -1.780826 | -1.823807 |         |         |         |
| (CH <sub>3</sub> ) <sub>2</sub> COO-HONO | O | -0.323346 | 1.788465  | -0.127155 | 40.99   | 65.31   | 94.87   |
|                                          | O | -0.933456 | 0.707341  | -0.762464 | 143.89  | 165.08  | 182.43  |
|                                          | C | -1.427404 | -0.163929 | -0.015067 | 184.81  | 254.84  | 336.26  |
|                                          | N | 1.668747  | -0.491904 | 0.103393  | 357.82  | 376.50  | 494.42  |

|                                     |   |           |           |           |         |         |         |
|-------------------------------------|---|-----------|-----------|-----------|---------|---------|---------|
|                                     | O | 2.027385  | 0.754380  | -0.212701 | 601.23  | 778.14  | 824.83  |
|                                     | H | 1.149904  | 1.272513  | -0.192924 | 905.48  | 949.75  | 992.83  |
|                                     | O | 2.575100  | -1.246430 | 0.120319  | 1062.31 | 1084.87 | 1100.49 |
|                                     | C | -2.010313 | -1.343730 | -0.692483 | 1107.66 | 1317.65 | 1381.08 |
|                                     | H | -1.444347 | -2.223239 | -0.376851 | 1406.82 | 1448.86 | 1461.75 |
|                                     | H | -3.040077 | -1.483491 | -0.362789 | 1471.93 | 1488.83 | 1579.39 |
|                                     | H | -1.962298 | -1.240373 | -1.771878 | 1668.58 | 1779.74 | 2780.97 |
|                                     | C | -1.402643 | -0.006457 | 1.447276  | 3065.31 | 3070.72 | 3128.64 |
|                                     | H | -0.357500 | 0.003060  | 1.763655  | 3129.22 | 3189.96 | 3191.10 |
|                                     | H | -1.801638 | 0.976862  | 1.699490  |         |         |         |
|                                     | H | -1.948582 | -0.807358 | 1.935197  |         |         |         |
| (CH <sub>3</sub> ) <sub>2</sub> COO | C | 0.371062  | 0.018585  | 0.000050  | 161.48  | 208.25  | 291.02  |
|                                     | O | -0.558411 | -0.817590 | -0.000008 | 329.95  | 366.36  | 493.49  |
|                                     | O | -1.838845 | -0.328935 | -0.000003 | 609.82  | 827.33  | 925.08  |
|                                     | C | 0.053885  | 1.456083  | -0.000006 | 953.09  | 989.39  | 1085.66 |
|                                     | H | -0.578150 | 1.668238  | 0.865389  | 1102.01 | 1316.06 | 1393.97 |
|                                     | H | 0.954341  | 2.062465  | -0.000046 | 1411.69 | 1442.13 | 1466.96 |
|                                     | H | -0.578203 | 1.668145  | -0.865370 | 1474.33 | 1486.77 | 1654.07 |
|                                     | C | 1.752599  | -0.524309 | 0.000001  | 3059.28 | 3065.43 | 3109.82 |
|                                     | H | 2.288094  | -0.158843 | 0.877727  | 3121.90 | 3182.23 | 3183.88 |
|                                     | H | 1.739149  | -1.610169 | 0.000607  |         |         |         |
|                                     | H | 2.287541  | -0.159787 | -0.878484 |         |         |         |

Table S2: Termolecular rate constants ( $k_t$ ) (in  $\text{cm}^6 \text{ molecule}^{-2} \text{ s}^{-1}$ ) and total termolecular rate constant ( $k_t^{\text{total}}$ ) for the WM catalysed  $\text{CH}_2\text{OO} + \text{HONO}$  reactions over the temperature range of 213–320 K, for all three paths, i.e., Path-A, Path-B, and Path-C.

| Temp. | $k_t^{\text{Path-A}}$  | $k_t^{\text{Path-B}}$  | $k_t^{\text{Path-C}}$  | $k_t^{\text{total}}$   |
|-------|------------------------|------------------------|------------------------|------------------------|
| 213   | $8.26 \times 10^{-27}$ | $1.09 \times 10^{-29}$ | $3.16 \times 10^{-29}$ | $8.30 \times 10^{-27}$ |
| 216   | $5.51 \times 10^{-27}$ | $8.73 \times 10^{-30}$ | $2.41 \times 10^{-29}$ | $5.54 \times 10^{-27}$ |
| 219   | $3.70 \times 10^{-27}$ | $6.98 \times 10^{-30}$ | $1.85 \times 10^{-29}$ | $3.73 \times 10^{-27}$ |
| 224   | $1.95 \times 10^{-27}$ | $4.85 \times 10^{-30}$ | $1.20 \times 10^{-29}$ | $1.97 \times 10^{-27}$ |
| 235   | $5.20 \times 10^{-28}$ | $2.28 \times 10^{-30}$ | $4.89 \times 10^{-30}$ | $5.27 \times 10^{-28}$ |
| 250   | $1.00 \times 10^{-28}$ | $8.67 \times 10^{-31}$ | $1.59 \times 10^{-30}$ | $1.03 \times 10^{-28}$ |
| 259   | $4.06 \times 10^{-29}$ | $5.03 \times 10^{-31}$ | $8.52 \times 10^{-31}$ | $4.19 \times 10^{-29}$ |
| 265   | $2.28 \times 10^{-29}$ | $3.54 \times 10^{-31}$ | $5.72 \times 10^{-31}$ | $2.38 \times 10^{-29}$ |
| 278   | $7.07 \times 10^{-30}$ | $1.71 \times 10^{-31}$ | $2.50 \times 10^{-31}$ | $7.49 \times 10^{-30}$ |
| 280   | $5.95 \times 10^{-30}$ | $1.53 \times 10^{-31}$ | $2.22 \times 10^{-31}$ | $6.33 \times 10^{-30}$ |
| 290   | $2.60 \times 10^{-30}$ | $9.02 \times 10^{-32}$ | $1.23 \times 10^{-31}$ | $2.81 \times 10^{-30}$ |
| 298   | $1.38 \times 10^{-30}$ | $5.96 \times 10^{-32}$ | $7.82 \times 10^{-32}$ | $1.52 \times 10^{-30}$ |
| 300   | $1.19 \times 10^{-30}$ | $5.40 \times 10^{-32}$ | $7.00 \times 10^{-32}$ | $1.31 \times 10^{-30}$ |
| 310   | $5.67 \times 10^{-31}$ | $3.33 \times 10^{-32}$ | $4.10 \times 10^{-32}$ | $6.42 \times 10^{-31}$ |
| 320   | $2.82 \times 10^{-31}$ | $2.06 \times 10^{-32}$ | $2.46 \times 10^{-32}$ | $3.27 \times 10^{-31}$ |

Table S3: Termolecular rate constants ( $k_t$ ) (in  $\text{cm}^6 \text{ molecule}^{-2} \text{ s}^{-1}$ ) and total termolecular rate constant ( $k_t^{\text{total}}$ ) for the WM catalysed  $(\text{CH}_3)_2\text{OO} + \text{HONO}$  reactions over the temperature range of 213–320 K, for all three paths, i.e., Path-A, Path-B, and Path-C.

| Temp. | $k_t^{\text{Path-A}}$  | $k_t^{\text{Path-B}}$  | $k_t^{\text{Path-C}}$  | $k_t^{\text{total}}$   |
|-------|------------------------|------------------------|------------------------|------------------------|
| 213   | $1.03 \times 10^{-22}$ | $3.79 \times 10^{-29}$ | $6.05 \times 10^{-27}$ | $1.03 \times 10^{-22}$ |
| 216   | $6.02 \times 10^{-23}$ | $3.13 \times 10^{-29}$ | $4.37 \times 10^{-27}$ | $6.02 \times 10^{-23}$ |
| 219   | $3.55 \times 10^{-23}$ | $2.60 \times 10^{-29}$ | $3.18 \times 10^{-27}$ | $3.55 \times 10^{-23}$ |
| 224   | $1.52 \times 10^{-23}$ | $1.93 \times 10^{-29}$ | $1.91 \times 10^{-27}$ | $1.52 \times 10^{-23}$ |
| 235   | $2.61 \times 10^{-24}$ | $1.04 \times 10^{-29}$ | $6.57 \times 10^{-28}$ | $2.61 \times 10^{-24}$ |
| 250   | $2.97 \times 10^{-25}$ | $4.84 \times 10^{-30}$ | $1.73 \times 10^{-28}$ | $2.97 \times 10^{-25}$ |
| 259   | $9.01 \times 10^{-26}$ | $3.16 \times 10^{-30}$ | $8.27 \times 10^{-29}$ | $9.02 \times 10^{-26}$ |
| 265   | $4.24 \times 10^{-26}$ | $2.39 \times 10^{-30}$ | $5.17 \times 10^{-29}$ | $4.24 \times 10^{-26}$ |
| 278   | $9.14 \times 10^{-27}$ | $1.35 \times 10^{-30}$ | $1.96 \times 10^{-29}$ | $9.16 \times 10^{-27}$ |
| 280   | $7.31 \times 10^{-27}$ | $1.24 \times 10^{-30}$ | $1.70 \times 10^{-29}$ | $7.33 \times 10^{-27}$ |
| 290   | $2.48 \times 10^{-27}$ | $8.13 \times 10^{-31}$ | $8.52 \times 10^{-30}$ | $2.49 \times 10^{-27}$ |
| 298   | $1.10 \times 10^{-27}$ | $5.86 \times 10^{-31}$ | $5.03 \times 10^{-30}$ | $1.10 \times 10^{-27}$ |
| 300   | $9.03 \times 10^{-28}$ | $5.40 \times 10^{-31}$ | $4.42 \times 10^{-30}$ | $9.08 \times 10^{-28}$ |
| 310   | $3.49 \times 10^{-28}$ | $3.62 \times 10^{-31}$ | $2.36 \times 10^{-30}$ | $3.51 \times 10^{-28}$ |
| 320   | $1.42 \times 10^{-28}$ | $2.44 \times 10^{-31}$ | $1.30 \times 10^{-30}$ | $1.43 \times 10^{-28}$ |

Table S4: Termolecular rate constants ( $k_t$ ) (in  $\text{cm}^6 \text{ molecule}^{-2} \text{ s}^{-1}$ ) and total termolecular rate constant ( $k_t^{total}$ ) for the WM catalysed anti- $\text{CH}_3\text{CHOO} + \text{HONO}$  reactions over the temperature range of 213–320 K, for all three paths, i.e., Path-A, Path-B, and Path-C.

| Temp. | $k_t^{Path-A}$         | $k_t^{Path-B}$         | $k_t^{Path-C}$         | $k_t^{total}$          |
|-------|------------------------|------------------------|------------------------|------------------------|
| 213   | $2.90 \times 10^{-23}$ | $2.03 \times 10^{-29}$ | $1.48 \times 10^{-26}$ | $2.90 \times 10^{-23}$ |
| 216   | $1.69 \times 10^{-23}$ | $1.62 \times 10^{-29}$ | $1.06 \times 10^{-26}$ | $1.70 \times 10^{-23}$ |
| 219   | $1.00 \times 10^{-23}$ | $1.30 \times 10^{-29}$ | $7.65 \times 10^{-27}$ | $1.00 \times 10^{-23}$ |
| 224   | $4.33 \times 10^{-24}$ | $9.12 \times 10^{-30}$ | $4.53 \times 10^{-27}$ | $4.33 \times 10^{-24}$ |
| 235   | $7.96 \times 10^{-25}$ | $4.36 \times 10^{-30}$ | $1.51 \times 10^{-27}$ | $7.97 \times 10^{-25}$ |
| 250   | $9.54 \times 10^{-26}$ | $1.73 \times 10^{-30}$ | $3.81 \times 10^{-28}$ | $9.58 \times 10^{-26}$ |
| 259   | $2.99 \times 10^{-26}$ | $1.03 \times 10^{-30}$ | $1.77 \times 10^{-28}$ | $3.00 \times 10^{-26}$ |
| 265   | $1.44 \times 10^{-26}$ | $7.37 \times 10^{-31}$ | $1.08 \times 10^{-28}$ | $1.45 \times 10^{-26}$ |
| 278   | $3.25 \times 10^{-27}$ | $3.71 \times 10^{-31}$ | $3.93 \times 10^{-29}$ | $3.29 \times 10^{-27}$ |
| 280   | $2.62 \times 10^{-27}$ | $3.35 \times 10^{-31}$ | $3.37 \times 10^{-29}$ | $2.65 \times 10^{-27}$ |
| 290   | $9.25 \times 10^{-28}$ | $2.04 \times 10^{-31}$ | $1.63 \times 10^{-29}$ | $9.42 \times 10^{-28}$ |
| 298   | $4.22 \times 10^{-28}$ | $1.39 \times 10^{-31}$ | $9.25 \times 10^{-30}$ | $4.31 \times 10^{-28}$ |
| 300   | $3.48 \times 10^{-28}$ | $1.27 \times 10^{-31}$ | $8.08 \times 10^{-30}$ | $3.57 \times 10^{-28}$ |
| 310   | $1.39 \times 10^{-28}$ | $8.06 \times 10^{-32}$ | $4.13 \times 10^{-30}$ | $1.44 \times 10^{-28}$ |
| 320   | $5.85 \times 10^{-29}$ | $5.19 \times 10^{-32}$ | $2.18 \times 10^{-30}$ | $6.08 \times 10^{-29}$ |

Table S5: Termolecular rate constants ( $k_t$ ) (in  $\text{cm}^6 \text{ molecule}^{-2} \text{ s}^{-1}$ ) and total termolecular rate constant ( $k_t^{total}$ ) for the WM catalysed syn- $\text{CH}_3\text{CHOO} + \text{HONO}$  reactions over the temperature range of 213–320 K, for all three paths, i.e., Path-A, Path-B, and Path-C.

| Temp. | $k_t^{Path-A}$         | $k_t^{Path-B}$         | $k_t^{Path-C}$         | $k_t^{total}$          |
|-------|------------------------|------------------------|------------------------|------------------------|
| 213   | $8.06 \times 10^{-23}$ | $3.01 \times 10^{-29}$ | $1.79 \times 10^{-26}$ | $8.06 \times 10^{-23}$ |
| 216   | $4.82 \times 10^{-23}$ | $2.46 \times 10^{-29}$ | $1.25 \times 10^{-26}$ | $4.82 \times 10^{-23}$ |
| 219   | $2.75 \times 10^{-23}$ | $2.00 \times 10^{-29}$ | $8.64 \times 10^{-27}$ | $2.75 \times 10^{-23}$ |
| 224   | $1.24 \times 10^{-23}$ | $1.44 \times 10^{-29}$ | $4.87 \times 10^{-27}$ | $1.24 \times 10^{-23}$ |
| 235   | $2.08 \times 10^{-24}$ | $7.28 \times 10^{-30}$ | $1.51 \times 10^{-27}$ | $2.08 \times 10^{-24}$ |
| 250   | $2.40 \times 10^{-25}$ | $3.01 \times 10^{-30}$ | $3.50 \times 10^{-28}$ | $2.41 \times 10^{-25}$ |
| 259   | $7.46 \times 10^{-26}$ | $1.80 \times 10^{-30}$ | $1.55 \times 10^{-28}$ | $7.48 \times 10^{-26}$ |
| 265   | $3.55 \times 10^{-26}$ | $1.27 \times 10^{-30}$ | $9.44 \times 10^{-29}$ | $3.56 \times 10^{-26}$ |
| 278   | $7.82 \times 10^{-27}$ | $6.55 \times 10^{-31}$ | $3.31 \times 10^{-29}$ | $7.85 \times 10^{-27}$ |
| 280   | $6.23 \times 10^{-27}$ | $5.99 \times 10^{-31}$ | $2.84 \times 10^{-29}$ | $6.26 \times 10^{-27}$ |
| 290   | $2.15 \times 10^{-27}$ | $3.61 \times 10^{-31}$ | $1.35 \times 10^{-29}$ | $2.16 \times 10^{-27}$ |
| 298   | $9.75 \times 10^{-28}$ | $2.51 \times 10^{-31}$ | $7.60 \times 10^{-30}$ | $9.83 \times 10^{-28}$ |
| 300   | $8.05 \times 10^{-28}$ | $2.28 \times 10^{-31}$ | $6.67 \times 10^{-30}$ | $8.12 \times 10^{-28}$ |
| 310   | $3.20 \times 10^{-28}$ | $1.48 \times 10^{-31}$ | $3.51 \times 10^{-30}$ | $3.24 \times 10^{-28}$ |
| 320   | $1.32 \times 10^{-28}$ | $9.44 \times 10^{-32}$ | $1.92 \times 10^{-30}$ | $1.34 \times 10^{-28}$ |

Table S6: Effective rate constants (in  $\text{s}^{-1}$ ) for reaction of  $\text{CH}_2\text{OO}$  with HONO,  $\text{H}_2\text{O}/(\text{H}_2\text{O})_2/\text{SO}_2$  and for WM catalyzed  $\text{CH}_2\text{OO} + \text{HONO}$  reaction over the temperature range of 213–320 K. The concentration are taken  $[\text{HONO}]=8.9\times 10^{10}$  molecule  $\text{cm}^{-3}$ ,  $[\text{SO}_2]=9.0\times 10^{10}$  molecule  $\text{cm}^{-3}$ , and  $[\text{H}_2\text{O}]$  and  $[(\text{H}_2\text{O})_2]$  corresponding to RH=20% and 100%.

| Temp. | $k_{eff}^{\text{H}_2\text{O}(RH=20\%)}$ | $k_{eff}^{\text{H}_2\text{O}(RH=100\%)}$ | $k_{eff}^{(\text{H}_2\text{O})_2(RH=20\%)}$ | $k_{eff}^{(\text{H}_2\text{O})_2(RH=100\%)}$ | $k_{eff}^{\text{HONO}}$ | $k_{eff}^{\text{HONO}(RH=20\%)}$ | $k_{eff}^{\text{HONO}(RH=100\%)}$ | $k_{\text{unimolecular}}$ | $k_{eff}^{\text{SO}_2}$ |
|-------|-----------------------------------------|------------------------------------------|---------------------------------------------|----------------------------------------------|-------------------------|----------------------------------|-----------------------------------|---------------------------|-------------------------|
| 213   | $4.91\times 10^{-3}$                    | $2.45\times 10^{-2}$                     | $7.42\times 10^{-2}$                        | 1.85                                         | 1.04                    | $5.01\times 10^{-2}$             | $2.50\times 10^{-1}$              | $5.34\times 10^{-8}$      |                         |
| 216   | $7.80\times 10^{-3}$                    | $3.90\times 10^{-2}$                     | $1.76\times 10^{-1}$                        | 4.41                                         | 1.02                    | $4.95\times 10^{-2}$             | $2.47\times 10^{-1}$              | $1.03\times 10^{-7}$      |                         |
| 219   | $1.23\times 10^{-2}$                    | $6.13\times 10^{-2}$                     | $3.99\times 10^{-1}$                        | 9.97                                         | 1.01                    | $4.88\times 10^{-2}$             | $2.44\times 10^{-1}$              | $1.94\times 10^{-7}$      |                         |
| 223   |                                         |                                          |                                             |                                              |                         |                                  |                                   |                           | 5.76                    |
| 224   | $2.53\times 10^{-2}$                    | $1.26\times 10^{-1}$                     | $7.34\times 10^{-1}$                        | $1.83\times 10^1$                            | 0.98                    | $4.76\times 10^{-2}$             | $2.38\times 10^{-1}$              | $5.38\times 10^{-7}$      |                         |
| 235   | $1.11\times 10^{-1}$                    | $5.54\times 10^{-1}$                     | 2.11                                        | $5.28\times 10^1$                            | 0.93                    | $4.45\times 10^{-2}$             | $2.22\times 10^{-1}$              | $4.37\times 10^{-6}$      |                         |
| 250   | $6.69\times 10^{-1}$                    | 3.35                                     | 9.66                                        | $2.42\times 10^2$                            | 0.85                    | $3.97\times 10^{-2}$             | $1.98\times 10^{-1}$              | $5.65\times 10^{-5}$      |                         |
| 259   | 1.77                                    | 8.87                                     | $2.54\times 10^1$                           | $6.35\times 10^2$                            | 0.81                    | $3.68\times 10^{-2}$             | $1.84\times 10^{-1}$              | $2.28\times 10^{-4}$      | 4.95                    |
| 265   | 3.27                                    | $1.63\times 10^1$                        | $3.66\times 10^1$                           | $9.15\times 10^2$                            | 0.78                    | $3.49\times 10^{-2}$             | $1.75\times 10^{-1}$              | $5.47\times 10^{-4}$      |                         |
| 266   |                                         |                                          |                                             |                                              |                         |                                  |                                   |                           | 3.96                    |
| 275   |                                         |                                          |                                             |                                              |                         |                                  |                                   |                           | 3.69                    |
| 278   | $1.12\times 10^1$                       | $5.59\times 10^1$                        |                                             |                                              | 0.72                    | $3.11\times 10^{-2}$             | $1.55\times 10^{-1}$              | $3.21\times 10^{-3}$      |                         |
| 280   | $1.25\times 10^1$                       | $6.26\times 10^1$                        | $1.04\times 10^2$                           | $2.60\times 10^3$                            | 0.71                    | $2.86\times 10^{-2}$             | $1.43\times 10^{-1}$              | $4.15\times 10^{-3}$      |                         |
| 281   |                                         |                                          |                                             |                                              |                         |                                  |                                   |                           | 3.69                    |
| 290   | $2.67\times 10^1$                       | $1.34\times 10^2$                        | $1.76\times 10^2$                           | $4.39\times 10^3$                            | 0.67                    | $2.37\times 10^{-2}$             | $1.19\times 10^{-1}$              | $1.43\times 10^{-2}$      |                         |
| 296   |                                         |                                          |                                             |                                              |                         |                                  |                                   |                           | 3.6                     |
| 298   | $4.77\times 10^1$                       | $2.39\times 10^2$                        | $2.61\times 10^2$                           | $6.52\times 10^3$                            | 0.64                    | $2.04\times 10^{-2}$             | $1.02\times 10^{-1}$              | $3.61\times 10^{-2}$      |                         |
| 300   | $5.40\times 10^1$                       | $2.70\times 10^2$                        | $2.82\times 10^2$                           | $7.05\times 10^3$                            | 0.63                    | $1.97\times 10^{-2}$             | $9.85\times 10^{-2}$              | $4.52\times 10^{-2}$      |                         |
| 310   | $1.03\times 10^2$                       | $5.17\times 10^2$                        | $4.35\times 10^2$                           | $1.09\times 10^4$                            | 0.60                    | $1.64\times 10^{-2}$             | $8.21\times 10^{-2}$              | $1.33\times 10^{-1}$      |                         |
| 316   |                                         |                                          |                                             |                                              |                         |                                  |                                   |                           | 3.78                    |
| 320   | $1.89\times 10^2$                       | $9.46\times 10^2$                        | $6.45\times 10^2$                           | $1.61\times 10^4$                            | 0.56                    | $1.37\times 10^{-2}$             | $6.86\times 10^{-2}$              | $3.65\times 10^{-1}$      |                         |

Table S7: Effective rate constants (in  $\text{s}^{-1}$ ) for reaction of  $(\text{CH}_3)_2\text{COO}$  with HONO,  $\text{H}_2\text{O}/(\text{H}_2\text{O})_2/\text{SO}_2$  and for WM catalyzed  $(\text{CH}_3)_2\text{COO} + \text{HONO}$  reaction over the temperature range of 213–320 K. The concentration are taken  $[\text{HONO}]=8.9\times 10^{10}$  molecule  $\text{cm}^{-3}$ ,  $[\text{SO}_2]=9.0\times 10^{10}$  molecule  $\text{cm}^{-3}$ , and  $[\text{H}_2\text{O}]$  and  $[(\text{H}_2\text{O})_2]$  corresponding to RH=20% and 100%.

| Temp. | $k_{eff}^{\text{H}_2\text{O}(RH=20\%)}$ | $k_{eff}^{\text{H}_2\text{O}(RH=100\%)}$ | $k_{eff}^{(\text{H}_2\text{O})_2(RH=20\%)}$ | $k_{eff}^{(\text{H}_2\text{O})_2(RH=100\%)}$ | $k_{eff}^{\text{HONO}}$ | $k_{eff}^{\text{HONO}(RH=20\%)}$ | $k_{eff}^{\text{HONO}(RH=100\%)}$ | $k_{\text{unimolecular}}$ | $k_{eff}^{\text{SO}_2}$ |
|-------|-----------------------------------------|------------------------------------------|---------------------------------------------|----------------------------------------------|-------------------------|----------------------------------|-----------------------------------|---------------------------|-------------------------|
| 213   | $2.83\times 10^{-5}$                    | $1.41\times 10^{-4}$                     | $1.35\times 10^{-6}$                        | $3.38\times 10^{-5}$                         | 3.80                    | $6.23\times 10^2$                | $3.12\times 10^3$                 | 1.82                      |                         |
| 216   | $4.80\times 10^{-5}$                    | $2.40\times 10^{-4}$                     | $4.11\times 10^{-6}$                        | $1.03\times 10^{-4}$                         | 3.71                    | $5.38\times 10^2$                | $2.69\times 10^3$                 | 2.18                      |                         |
| 219   | $8.03\times 10^{-5}$                    | $4.02\times 10^{-4}$                     | $1.19\times 10^{-5}$                        | $2.96\times 10^{-4}$                         | 3.64                    | $4.64\times 10^2$                | $2.32\times 10^3$                 | 2.60                      |                         |
| 224   | $1.84\times 10^{-4}$                    | $9.18\times 10^{-4}$                     | $3.22\times 10^{-5}$                        | $8.05\times 10^{-4}$                         | 3.50                    | $3.66\times 10^2$                | $1.83\times 10^3$                 | 3.49                      |                         |
| 235   | $9.98\times 10^{-4}$                    | $4.99\times 10^{-3}$                     | $2.07\times 10^{-4}$                        | $5.17\times 10^{-3}$                         | 3.21                    | $2.20\times 10^2$                | $1.10\times 10^3$                 | 6.73                      |                         |
| 250   | $7.87\times 10^{-3}$                    | $3.94\times 10^{-2}$                     | $2.53\times 10^{-3}$                        | $6.33\times 10^{-2}$                         | 2.83                    | $1.15\times 10^2$                | $5.73\times 10^2$                 | $1.65\times 10^1$         |                         |
| 259   | $2.42\times 10^{-2}$                    | $1.21\times 10^{-1}$                     | $1.14\times 10^{-2}$                        | $2.85\times 10^{-1}$                         | 2.61                    | $7.92\times 10^1$                | $3.96\times 10^2$                 | $2.81\times 10^1$         |                         |
| 265   | $4.90\times 10^{-2}$                    | $2.45\times 10^{-1}$                     | $2.31\times 10^{-2}$                        | $5.79\times 10^{-1}$                         | 2.47                    | $6.24\times 10^1$                | $3.12\times 10^2$                 | $4.01\times 10^1$         |                         |
| 278   | $2.04\times 10^{-1}$                    | 1.02                                     |                                             |                                              | 2.19                    | $3.80\times 10^1$                | $1.90\times 10^2$                 | $8.63\times 10^1$         |                         |
| 280   | $2.35\times 10^{-1}$                    | 1.17                                     | $1.45\times 10^{-1}$                        | 3.64                                         | 2.15                    | $3.31\times 10^1$                | $1.65\times 10^2$                 | $9.70\times 10^1$         |                         |
| 283   |                                         |                                          |                                             |                                              |                         |                                  |                                   |                           | 1.71                    |
| 285   |                                         |                                          |                                             |                                              |                         |                                  |                                   |                           | 1.63                    |
| 290   | $5.77\times 10^{-1}$                    | 2.89                                     | $3.99\times 10^{-1}$                        | 9.96                                         | 1.95                    | $2.10\times 10^1$                | $1.05\times 10^2$                 | $1.73\times 10^2$         | 1.46                    |
| 295   |                                         |                                          |                                             |                                              |                         |                                  |                                   |                           | 1.31                    |
| 298   | 1.13                                    | 5.65                                     | $8.54\times 10^{-1}$                        | $2.13\times 10^1$                            | 1.80                    | $1.48\times 10^1$                | $7.42\times 10^1$                 | $2.75\times 10^2$         | 1.22                    |
| 300   | 1.33                                    | 6.64                                     | 1.01                                        | $2.52\times 10^1$                            | 1.77                    | $1.36\times 10^1$                | $6.82\times 10^1$                 | $3.09\times 10^2$         | 1.17                    |
| 303   |                                         |                                          |                                             |                                              |                         |                                  |                                   |                           | 1.1                     |
| 310   | 2.89                                    | $1.44\times 10^1$                        | 2.38                                        | $5.96\times 10^1$                            | 1.60                    | 8.99                             | $4.50\times 10^1$                 | $5.45\times 10^2$         |                         |
| 320   | 5.96                                    | $2.98\times 10^1$                        | 5.30                                        | $1.32\times 10^2$                            | 1.44                    | 6.02                             | $3.01\times 10^1$                 | $9.57\times 10^2$         |                         |

Table S8: Effective rate constants (in  $\text{s}^{-1}$ ) for reaction of anti- $\text{CH}_3\text{CHOO}$  with  $\text{HONO}$ ,  $\text{H}_2\text{O}/(\text{H}_2\text{O})_2/\text{SO}_2$  and for WM catalyzed anti- $\text{CH}_3\text{CHOO} + \text{HONO}$  reaction over the temperature range of 213–320 K. The concentration are taken  $[\text{HONO}]=8.9\times 10^{10}$  molecule  $\text{cm}^{-3}$ ,  $[\text{SO}_2]=9.0\times 10^{10}$  molecule  $\text{cm}^{-3}$ , and  $[\text{H}_2\text{O}]$  and  $[(\text{H}_2\text{O})_2]$  corresponding to RH=20% and 100%.

| Temp. | $k_{eff}^{\text{H}_2\text{O}(RH=20\%)}$ | $k_{eff}^{\text{H}_2\text{O}(RH=100\%)}$ | $k_{eff}^{(\text{H}_2\text{O})_2(RH=20\%)}$ | $k_{eff}^{(\text{H}_2\text{O})_2(RH=100\%)}$ | $k_{eff}^{\text{HONO}}$ | $k_{eff}^{\text{HONO}(RH=20\%)}$ | $k_{eff}^{\text{HONO}(RH=100\%)}$ | $k_{unimolecular}$   | $k_{eff}^{\text{SO}_2}$ |
|-------|-----------------------------------------|------------------------------------------|---------------------------------------------|----------------------------------------------|-------------------------|----------------------------------|-----------------------------------|----------------------|-------------------------|
| 213   | 1.80                                    | 8.98                                     | $2.99\times 10^{-2}$                        | $7.48\times 10^{-1}$                         | 8.38                    | $1.75\times 10^2$                | $8.74\times 10^2$                 | $1.55\times 10^{-3}$ |                         |
| 216   | 2.64                                    | $1.32\times 10^1$                        | $8.00\times 10^{-2}$                        | 2.00                                         | 8.39                    | $1.51\times 10^2$                | $7.57\times 10^2$                 | $2.57\times 10^{-3}$ |                         |
| 219   | 3.83                                    | $1.92\times 10^1$                        | $2.03\times 10^{-1}$                        | 5.08                                         | 8.39                    | $1.31\times 10^2$                | $6.55\times 10^2$                 | $4.20\times 10^{-3}$ |                         |
| 224   | 6.98                                    | $3.49\times 10^1$                        | $4.49\times 10^{-1}$                        | $1.12\times 10^1$                            | 8.39                    | $1.05\times 10^2$                | $5.23\times 10^2$                 | $9.25\times 10^{-3}$ |                         |
| 235   | $2.38\times 10^1$                       | $1.19\times 10^2$                        | 1.89                                        | $4.73\times 10^1$                            | 8.32                    | $6.73\times 10^1$                | $3.36\times 10^2$                 | $4.68\times 10^{-2}$ |                         |
| 250   | $1.06\times 10^2$                       | $5.31\times 10^2$                        | $1.38\times 10^1$                           | $3.46\times 10^2$                            | 8.13                    | $3.69\times 10^1$                | $1.85\times 10^2$                 | $3.40\times 10^{-1}$ |                         |
| 259   | $2.39\times 10^2$                       | $1.19\times 10^3$                        | $4.71\times 10^1$                           | $1.18\times 10^3$                            | 7.97                    | $2.64\times 10^1$                | $1.32\times 10^2$                 | 1.00                 |                         |
| 265   | $3.98\times 10^2$                       | $1.99\times 10^3$                        | $7.99\times 10^1$                           | $2.00\times 10^3$                            | 7.85                    | $2.13\times 10^1$                | $1.07\times 10^2$                 | 1.99                 |                         |
| 278   | $1.11\times 10^3$                       | $5.55\times 10^3$                        | $7.99\times 10^1$                           | $2.00\times 10^3$                            | 7.55                    | $1.36\times 10^1$                | $6.82\times 10^1$                 | 7.88                 |                         |
| 280   | $1.21\times 10^3$                       | $6.04\times 10^3$                        | $3.32\times 10^2$                           | $8.30\times 10^3$                            | 7.50                    | $1.20\times 10^1$                | $5.98\times 10^1$                 | 9.64                 |                         |
| 290   | $2.24\times 10^3$                       | $1.12\times 10^4$                        | $7.07\times 10^2$                           | $1.77\times 10^4$                            | 7.23                    | 7.95                             | $3.97\times 10^1$                 | $2.53\times 10^1$    |                         |
| 293   |                                         |                                          |                                             |                                              |                         |                                  |                                   |                      |                         |
| 295   |                                         |                                          |                                             |                                              |                         |                                  |                                   |                      |                         |
| 298   | $3.56\times 10^3$                       | $1.78\times 10^4$                        | $1.25\times 10^3$                           | $3.13\times 10^4$                            | 7.01                    | 5.79                             | $2.89\times 10^1$                 | $5.22\times 10^1$    | 6.03                    |
| 300   | $3.98\times 10^3$                       | $1.99\times 10^4$                        | $1.41\times 10^3$                           | $3.53\times 10^4$                            | 6.95                    | 5.35                             | $2.68\times 10^1$                 | $6.23\times 10^1$    |                         |
| 310   | $6.77\times 10^3$                       | $3.39\times 10^4$                        | $2.68\times 10^3$                           | $6.69\times 10^4$                            | 6.65                    | 3.68                             | $1.84\times 10^1$                 | $1.45\times 10^2$    |                         |
| 320   | $1.11\times 10^4$                       | $5.55\times 10^4$                        | $4.83\times 10^3$                           | $1.21\times 10^5$                            | 6.35                    | 2.55                             | $1.27\times 10^1$                 | $3.20\times 10^2$    |                         |

Table S9: Effective rate constants (in  $\text{s}^{-1}$ ) for reaction of syn- $\text{CH}_3\text{CHOO}$  with  $\text{HONO}$ ,  $\text{H}_2\text{O}/(\text{H}_2\text{O})_2/\text{SO}_2$  and for WM catalyzed syn- $\text{CH}_3\text{CHOO} + \text{HONO}$  reaction over the temperature range of 213–320 K. The concentration are taken  $[\text{HONO}]=8.9\times 10^{10}$  molecule  $\text{cm}^{-3}$ ,  $[\text{SO}_2]=9.0\times 10^{10}$  molecule  $\text{cm}^{-3}$ , and  $[\text{H}_2\text{O}]$  and  $[(\text{H}_2\text{O})_2]$  corresponding to RH=20% and 100%.

| Temp. | $k_{eff}^{\text{H}_2\text{O}(RH=20\%)}$ | $k_{eff}^{\text{H}_2\text{O}(RH=100\%)}$ | $k_{eff}^{(\text{H}_2\text{O})_2(RH=20\%)}$ | $k_{eff}^{(\text{H}_2\text{O})_2(RH=100\%)}$ | $k_{eff}^{\text{HONO}}$ | $k_{eff}^{\text{HONO}(RH=20\%)}$ | $k_{eff}^{\text{HONO}(RH=100\%)}$ | $k_{unimolecular}$ | $k_{eff}^{\text{SO}_2}$ |
|-------|-----------------------------------------|------------------------------------------|---------------------------------------------|----------------------------------------------|-------------------------|----------------------------------|-----------------------------------|--------------------|-------------------------|
| 213   | $9.21\times 10^{-7}$                    | $4.60\times 10^{-6}$                     | $6.01\times 10^{-8}$                        | $1.50\times 10^{-6}$                         | $8.17\times 10^{-1}$    | $4.86\times 10^2$                | $2.43\times 10^3$                 | 1.15               |                         |
| 216   | $1.65\times 10^{-6}$                    | $8.23\times 10^{-6}$                     | $1.92\times 10^{-7}$                        | $4.79\times 10^{-6}$                         | $8.12\times 10^{-1}$    | $4.31\times 10^2$                | $2.15\times 10^3$                 | 1.37               |                         |
| 219   | $2.89\times 10^{-6}$                    | $1.45\times 10^{-5}$                     | $5.78\times 10^{-7}$                        | $1.45\times 10^{-5}$                         | $8.08\times 10^{-1}$    | $3.59\times 10^2$                | $1.80\times 10^3$                 | 1.63               |                         |
| 224   | $7.16\times 10^{-6}$                    | $3.58\times 10^{-5}$                     | $1.69\times 10^{-6}$                        | $4.22\times 10^{-5}$                         | $7.98\times 10^{-1}$    | $2.99\times 10^2$                | $1.49\times 10^3$                 | 2.17               |                         |
| 235   | $4.59\times 10^{-5}$                    | $2.29\times 10^{-4}$                     | $1.26\times 10^{-5}$                        | $3.14\times 10^{-4}$                         | $7.73\times 10^{-1}$    | $1.75\times 10^2$                | $8.77\times 10^2$                 | 4.10               |                         |
| 250   | $4.42\times 10^{-4}$                    | $2.21\times 10^{-3}$                     | $1.84\times 10^{-4}$                        | $4.61\times 10^{-3}$                         | $7.29\times 10^{-1}$    | $9.27\times 10^1$                | $4.64\times 10^2$                 | 9.68               |                         |
| 259   | $1.51\times 10^{-3}$                    | $7.56\times 10^{-3}$                     | $9.17\times 10^{-4}$                        | $2.29\times 10^{-2}$                         | $7.01\times 10^{-1}$    | $6.56\times 10^1$                | $3.28\times 10^2$                 | $1.61\times 10^1$  |                         |
| 265   | $3.28\times 10^{-3}$                    | $1.64\times 10^{-2}$                     | $1.98\times 10^{-3}$                        | $4.94\times 10^{-2}$                         | $6.80\times 10^{-1}$    | $5.24\times 10^1$                | $2.62\times 10^2$                 | $2.25\times 10^1$  |                         |
| 278   | $1.56\times 10^{-2}$                    | $7.81\times 10^{-2}$                     | $1.43\times 10^{-2}$                        | $3.57\times 10^{-1}$                         | $6.36\times 10^{-1}$    | $3.26\times 10^1$                | $1.63\times 10^2$                 | $4.64\times 10^1$  |                         |
| 280   | $1.84\times 10^{-2}$                    | $9.18\times 10^{-2}$                     | $1.43\times 10^{-2}$                        | $3.57\times 10^{-1}$                         | $6.29\times 10^{-1}$    | $2.83\times 10^1$                | $1.41\times 10^2$                 | $5.18\times 10^1$  |                         |
| 290   | $4.96\times 10^{-2}$                    | $2.48\times 10^{-1}$                     | $4.27\times 10^{-2}$                        | 1.07                                         | $5.94\times 10^{-1}$    | $1.83\times 10^1$                | $9.13\times 10^1$                 | $8.92\times 10^1$  |                         |
| 293   |                                         |                                          |                                             |                                              |                         |                                  |                                   |                    |                         |
| 298   | $1.04\times 10^{-1}$                    | $5.22\times 10^{-1}$                     | $9.75\times 10^{-2}$                        | 2.44                                         | $5.66\times 10^{-1}$    | $1.32\times 10^1$                | $6.60\times 10^1$                 | $1.37\times 10^2$  | 2.61                    |
| 300   | $1.25\times 10^{-1}$                    | $6.24\times 10^{-1}$                     | $1.17\times 10^{-1}$                        | 2.92                                         | $5.59\times 10^{-1}$    | $1.22\times 10^1$                | $6.10\times 10^1$                 | $1.53\times 10^2$  | 2.16                    |
| 310   | $2.94\times 10^{-1}$                    | 1.47                                     | $2.98\times 10^{-1}$                        | 7.45                                         | $5.25\times 10^{-1}$    | 8.29                             | $4.15\times 10^1$                 | $2.59\times 10^2$  |                         |
| 320   | $6.56\times 10^{-1}$                    | 3.28                                     | $7.10\times 10^{-1}$                        | $1.77\times 10^1$                            | $4.92\times 10^{-1}$    | 5.63                             | $2.82\times 10^1$                 | $4.37\times 10^2$  |                         |

Table S10: The fitting rate constants of reactions in the GEOS-Chem.

| Reaction                                                                                                                        | Rate Coefficient ( $\text{cm}^6 \text{ molecule}^{-2} \text{ s}^{-1}$ ) |
|---------------------------------------------------------------------------------------------------------------------------------|-------------------------------------------------------------------------|
| $\text{CH}_2\text{OO} + \text{HNO}_2 + \text{H}_2\text{O} = \text{CH}_2\text{O} + \text{NO}_2 + \text{OH} + \text{H}_2\text{O}$ | GCARR_ac(6.03d-40, 6426.0d0)                                            |
| $\text{CH}_3\text{CHOO} + \text{HNO}_2 + \text{H}_2\text{O} = \text{ALD2} + \text{NO}_2 + \text{OH} + \text{H}_2\text{O}$       | GCARR_ac(4.36d-40, 8448.0d0)                                            |

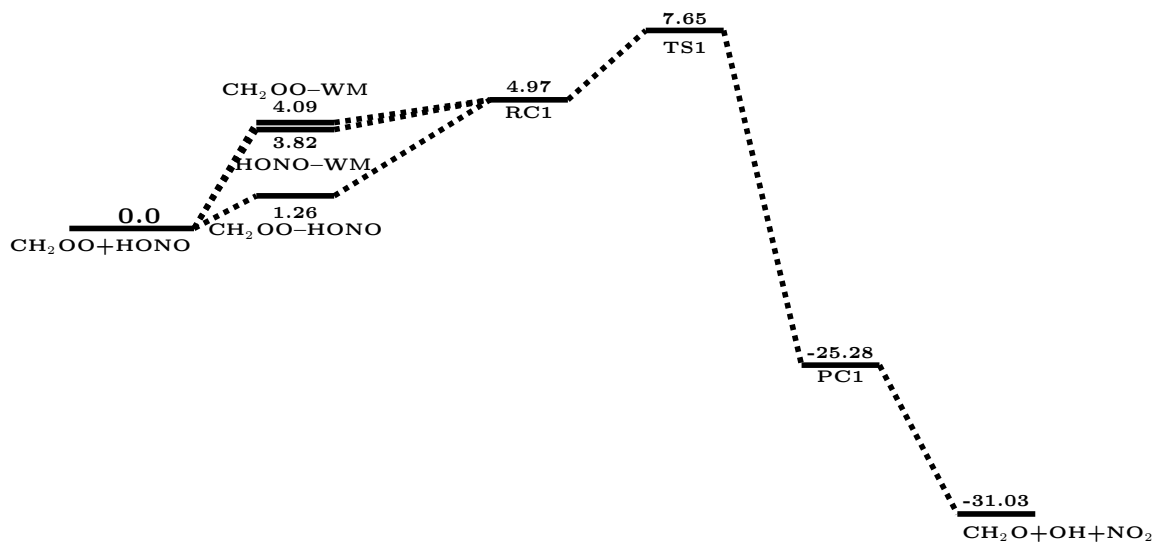

Figure S1: Gibbs energy profile ( $\text{kcal mol}^{-1}$ ) for  $\text{CH}_2\text{OO} + \text{HONO}$  reaction obtained at CCSD(T)/CBS//M06-2X/aug-cc-pVTZ level of theory at 298 K.

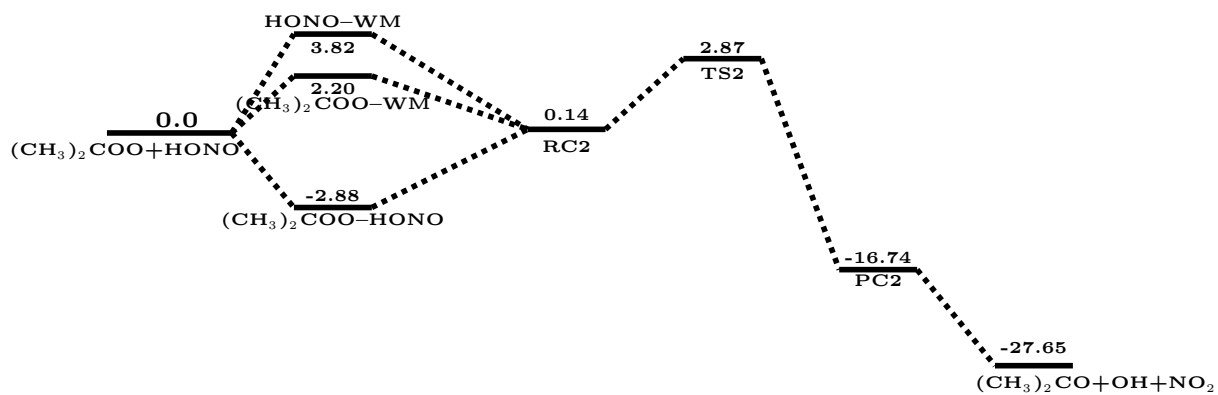

Figure S2: Gibbs energy profile (kcal mol<sup>-1</sup>) for (CH<sub>3</sub>)<sub>2</sub>COO + HONO reaction obtained at CCSD(T)/CBS//M06-2X/aug-cc-pVTZ level of theory at 298 K.

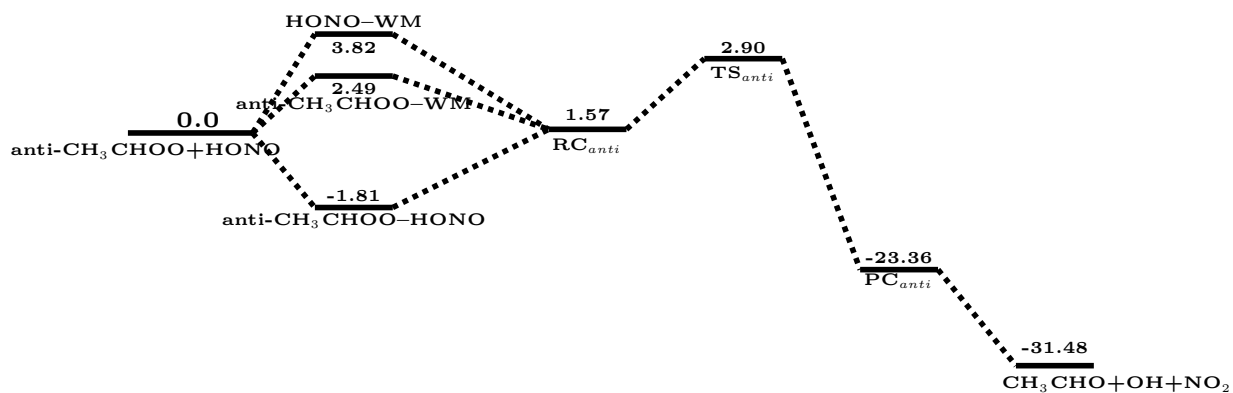

Figure S3: Gibbs energy profile (kcal mol<sup>-1</sup>) for anti-CH<sub>3</sub>CHOO + HONO reaction obtained at CCSD(T)/CBS//M06-2X/aug-cc-pVTZ level of theory at 298 K.

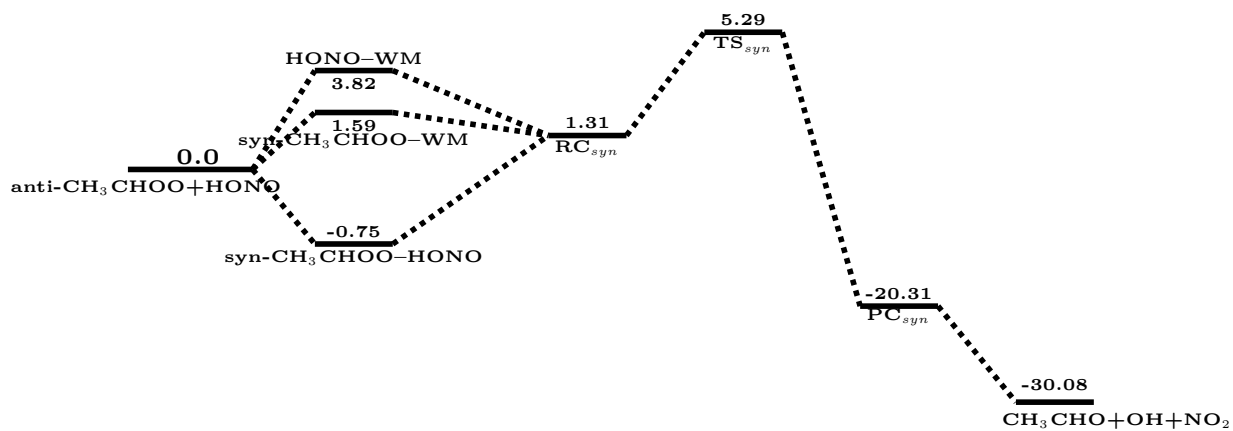

Figure S4: Gibbs energy profile (kcal mol<sup>-1</sup>) for syn-CH<sub>3</sub>CHO + HONO reaction obtained at CCSD(T)/CBS//M06-2X/aug-cc-pVTZ level of theory at 298 K.

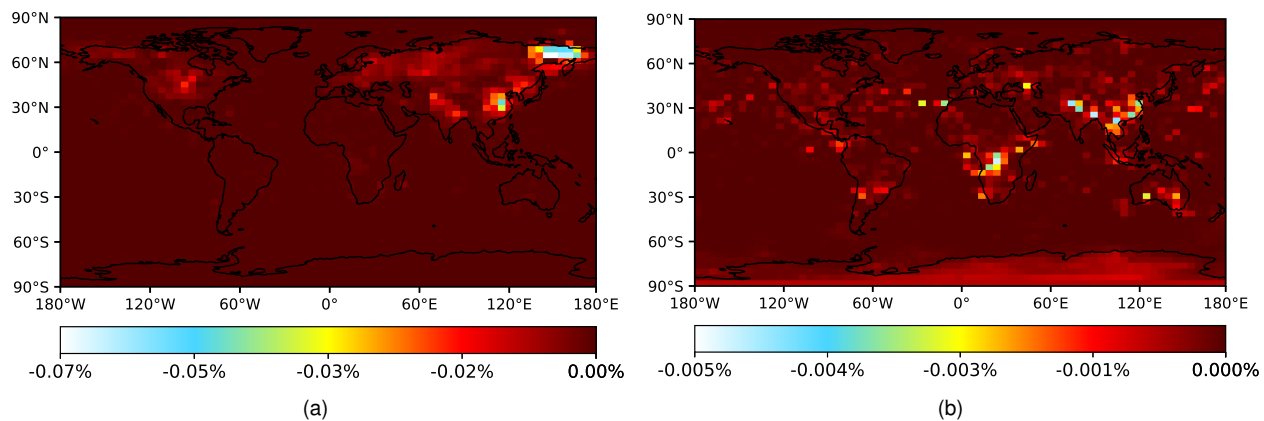

Figure S5: Global relative changes in  $\text{CH}_2\text{OO}$  concentrations resulting from the inclusion of the water catalyzed (WM)  $\text{CI} + \text{HONO}$  reaction in 24-hour simulations. (a)  $\text{CH}_2\text{OO}$  changes in January, (b)  $\text{CH}_2\text{OO}$  changes in June.

## References

- (1) Varandas, A.; Pansini, F. Narrowing the error in electron correlation calculations by basis set re-hierarchization and use of the unified singlet and triplet electron-pair extrapolation scheme: Application to a test set of 106 systems. *J. Chem. Phys.* **2014**, *141*, 224113.
- (2) Pansini, F.; Neto, A.; Varandas, A. Extrapolation of Hartree–Fock and multiconfiguration self-consistent-field energies to the complete basis set limit. *Theor. Chem. Acc.* **2016**, *135*, 1–6.
- (3) Barker, J.; Nguyen, T.; Stanton, J.; Aieta, C.; Ceotto, M.; Gabas, F.; Kumar, T.; Li, C.; Lohr, L.; Maranzana, A.; others MultiWell-2021 Software Suite; J. R. Barker, University of Michigan, Ann Arbor, Michigan, USA. **2021**, <http://claspresearch.engin.umich.edu/multiwell/> (accessed march 5, 2025).
